# Supplementary material for: A biscationic imidazolium ionic liquid immobilized on graphene oxide as an efficient heterogeneous catalyst for the synthesis of tetraketone derivatives
Source: Royal Society of Chemistry journal article supplement (doi:10.1039/d3nj03812b), 2023-11-14
Supplement: d3nj03812b1.pdf [file d3nj03812b1.pdf]

## Electronic Supplementary Information (ESI)

### S1: Spectral Data of Representative Products of Tetraketone Derivatives

#### 1. 2,2'-(phenylmethylene)bis(3-hydroxy-5,5-dimethylcyclohex-2-en-1-one)

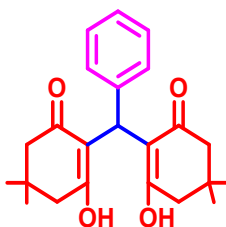

*Colorless crystals*;  $^1\text{H}$  NMR (400 MHz,  $\text{CDCl}_3$ ):  $\delta$  11.91 (brs, 1H), 7.24-7.28 (m, 2H), 7.14-7.18 (m, 1H), 7.08-7.10 (m, 2H), 5.53 (s, 1H), 2.28- 2.48 (m, 8H), 1.23 (s, 6H), 1.09 (s, 6H) ppm.  $^{13}\text{C}$  NMR (75 MHz,  $\text{CDCl}_3$ ):  $\delta$  190.59, 189.51, 138.13, 128.31, 126.85, 125.94, 115.67, 47.12, 46.51, 32.81, 31.49, 29.76, 27.47 ppm. HRMS (ES) Calcd: 368.3664. Found: 369.3722  $[\text{M} + \text{H}]^+$  and 370.3805  $[\text{MH} + 2]^+$ .

#### 2. 2,2'-(p-tolylmethylene)bis(3-hydroxy-5,5-dimethylcyclohex-2-en-1-one)

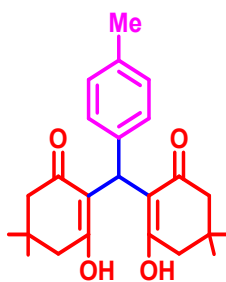

*Light yellow solid*;  $^1\text{H}$  NMR (400 MHz,  $\text{CDCl}_3$ ):  $\delta$  11.93 (brs, 1H), 7.07 (d, 2H), 6.97 (d, 2H), 5.50 (s, 1H), 2.37- 2.51 (m, 8H), 2.28 (s, 3H), 1.22 (s, 6H), 1.09 (s, 6H) ppm.  $^{13}\text{C}$  NMR (75 MHz,  $\text{CDCl}_3$ ):  $\delta$  190.55, 189.53, 135.35, 134.97, 129.04, 126.74, 115.80, 54.19, 47.13, 46.50, 32.47, 31.49, 29.75, 28.33, 27.45, 20.99 ppm. HRMS (ES) Calcd: 382.2144. Found: 383.2246  $[\text{M} + \text{H}]^+$  and 384.2334  $[\text{MH} + 2]^+$ .

3. 2,2'-((4-nitrophenyl)methylene)bis(3-hydroxy-5,5-dimethylcyclohex-2-en-1-one)

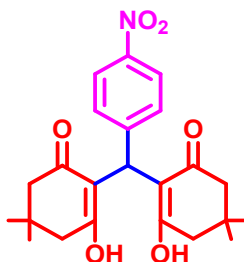

White solid;  $^1\text{H}$  NMR (400 MHz,  $\text{CDCl}_3$ ):  $\delta$  11.77 (brs, 1H), 8.10 (d, 2H), 7.22 (d, 2H), 5.52 (s, 1H), 2.29-2.49 (m, 8H), 1.21 (s, 6H), 1.09 (s, 6H) ppm.  $^{13}\text{C}$  NMR (75 MHz,  $\text{CDCl}_3$ ):  $\delta$  191.03, 189.67, 146.65, 146.18, 127.72, 123.57, 114.97, 54.17, 47.06, 33.31, 31.54, 29.56, 27.53 ppm. HRMS (ES) Calcd: 413.1838. Found: 414.1925  $[\text{M} + \text{H}]^+$  and 415.2004  $[\text{MH} + 2]^+$ .

4. 2,2'-((4-methoxyphenyl)methylene)bis(3-hydroxy-5,5-dimethylcyclohex-2-en-1-one)

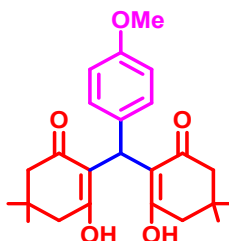

White solid;  $^1\text{H}$  NMR (400 MHz,  $\text{CDCl}_3$ ):  $\delta$  11.91 (brs, 1H), 6.98 (d, 2H), 6.79 (d, 2H), 5.47 (s, 1H), 3.75 (s, 3H), 2.27-2.46 (m, 8H), 1.21 (s, 6H), 1.08 (s, 6H) ppm.  $^{13}\text{C}$  NMR (75 MHz,  $\text{CDCl}_3$ ):  $\delta$  190.51, 189.47, 157.66, 129.90, 127.88, 115.86, 113.72, 55.28, 47.14, 46.50, 32.10, 31.47, 29.76, 27.45 ppm. HRMS (ES) Calcd: 398.2093. Found: 399.2184  $[\text{M} + \text{H}]^+$  and 400.2245  $[\text{MH} + 2]^+$ .

5. 2,2'-((2-nitrophenyl)methylene)bis(3-hydroxy-5,5-dimethylcyclohex-2-en-1-one)

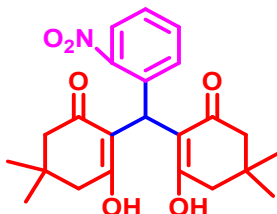

Yellow solid;  $^1\text{H}$  NMR (400 MHz,  $\text{CDCl}_3$ ):  $\delta$  11.59 (brs, 1H), 7.53 (d, 1H), 7.45 (t, 1H), 7.30 (t, 1H), 7.23 (d, 1H), 6.02 (s, 1H), 2.16-2.50 (m, 8H), 1.13 (s, 6H), 1.00 (s, 6H) ppm.  $^{13}\text{C}$  NMR (75 MHz,  $\text{CDCl}_3$ ):  $\delta$  190.99, 189.45, 149.79, 132.21,

131.44, 129.67, 127.24, 124.40, 114.72, 46.93, 46.35, 31.97, 30.11, 28.62, 28.23 ppm. HRMS (ES) Calcd: 413.3705. Found: 414.3778  $[M + H]^+$  and 415.3788  $[MH + 2]^+$ .

6. 2,2'-((3-nitrophenyl)methylene)bis(3-hydroxy-5,5-dimethylcyclohex-2-en-1-one)

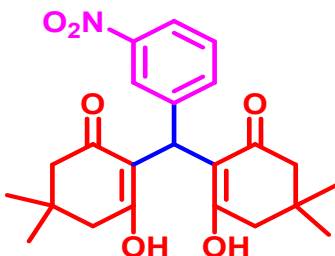

*Yellow solid*;  $^1\text{H}$  NMR (400 MHz,  $\text{CDCl}_3$ ):  $\delta$  11.84 (brs, 1H), 8.00 (d, 1H), 7.97 (s, 1H), 7.37-7.43 (m, 2H), 5.51 (s, 1H), 2.28-2.49 (m, 8H), 1.24 (s, 6H), 1.09 (s, 6H) ppm.  $^{13}\text{C}$  NMR (75 MHz,  $\text{CDCl}_3$ ):  $\delta$  191.19, 189.68, 148.44, 140.79, 132.99, 129.18, 122.27, 121.08, 114.81, 47.04, 46.47, 32.92, 31.49, 31.01, 29.75, 27.32 ppm. HRMS (ES) Calcd: 413.2006. Found: 414.2079  $[M + H]^+$  and 415.1933  $[MH + 2]^+$ .

7. 2,2'-((3,4-dibromophenyl)methylene)bis(3-hydroxy-5,5-dimethylcyclohex-2-en-1-one)

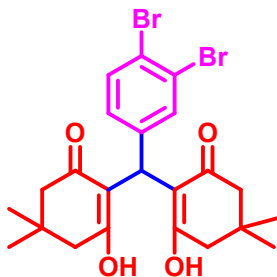

*White solid*;  $^1\text{H}$  NMR (400 MHz,  $\text{CDCl}_3$ ):  $\delta$  11.97 (brs, 1H), 6.77 (d, 1H), 6.59-6.63 (m, 2H), 5.49 (s, 1H), 2.33-2.41 (m, 8H), 1.22 (s, 6H), 1.10 (s, 6H) ppm.  $^{13}\text{C}$  NMR (75 MHz,  $\text{CDCl}_3$ ):  $\delta$  190.50, 189.44, 148.70, 147.07, 130.49, 118.93, 115.84, 110.91, 110.47, 55.90, 55.72, 47.15, 46.46, 32.37, 31.30, 29.99, 27.13 ppm. HRMS (ES) Calcd: 524.0198. Found: 525.0176  $[M + H]^+$  and 526.0252  $[MH + 2]^+$ .

1.  $^1\text{H}$  and  $^{13}\text{C}$  spectra of 2,2'-(phenylmethylene)bis(3-hydroxy-5,5-dimethylcyclohex-2-en-1-one)

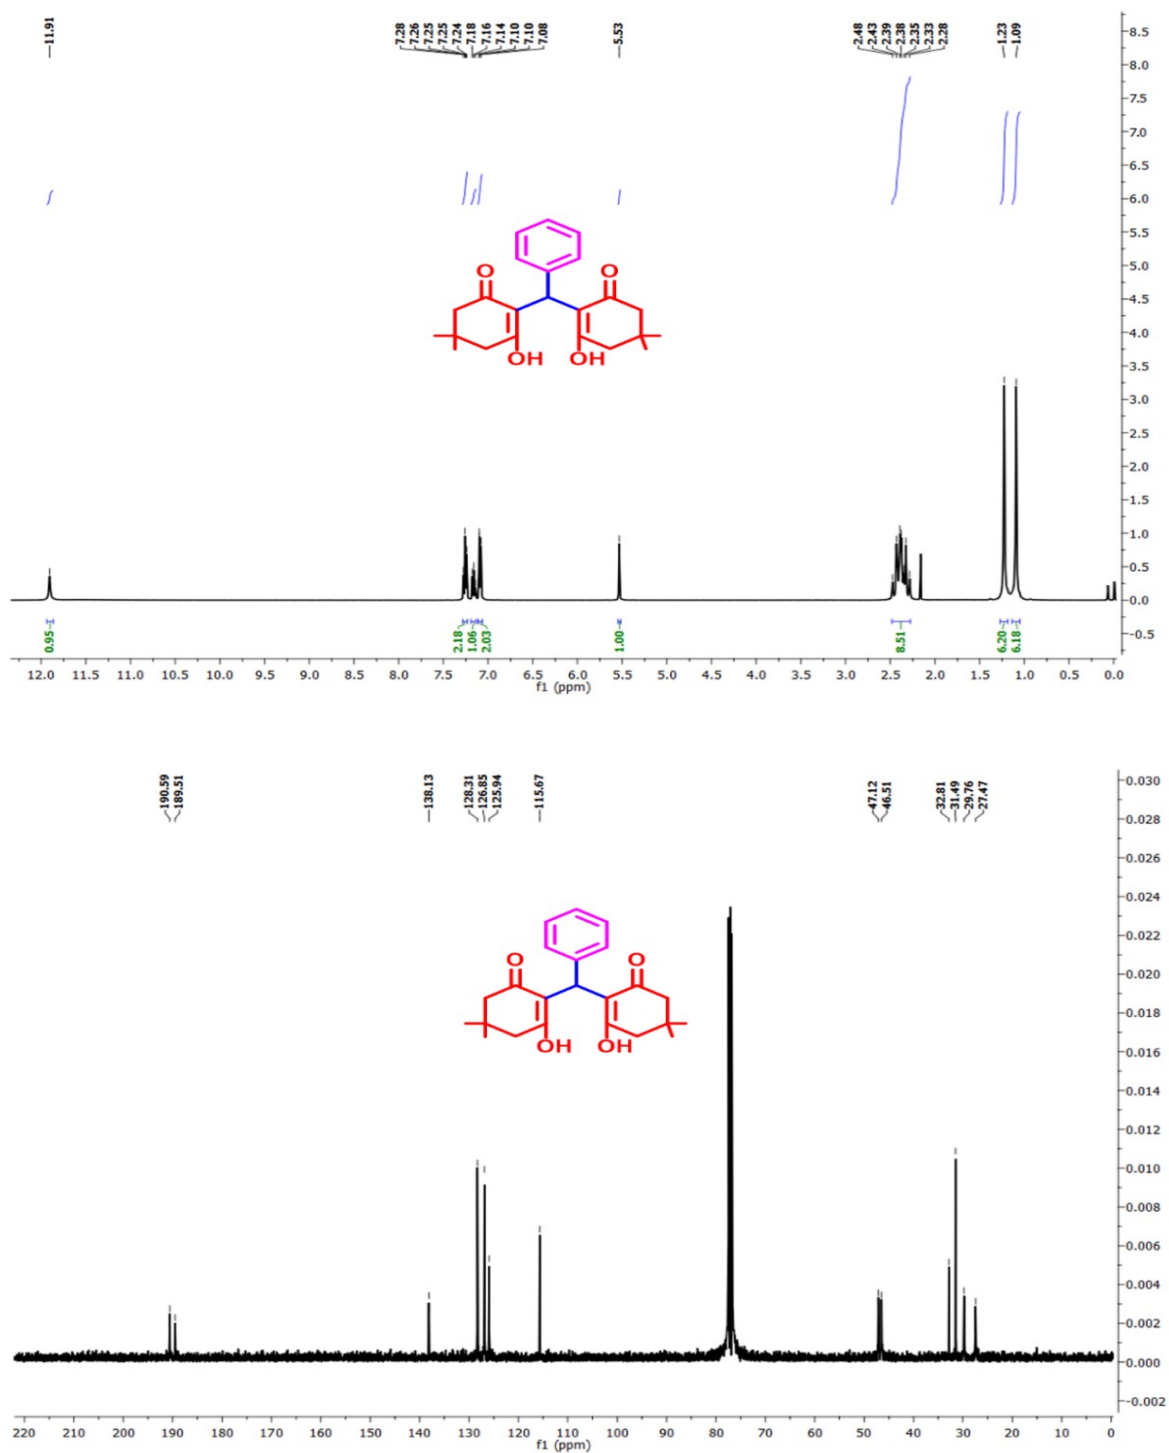

2.  $^1\text{H}$  and  $^{13}\text{C}$  spectra of 2,2'-(p-tolylmethylene)bis(3-hydroxy-5,5-dimethylcyclohex-2-en-1-one)

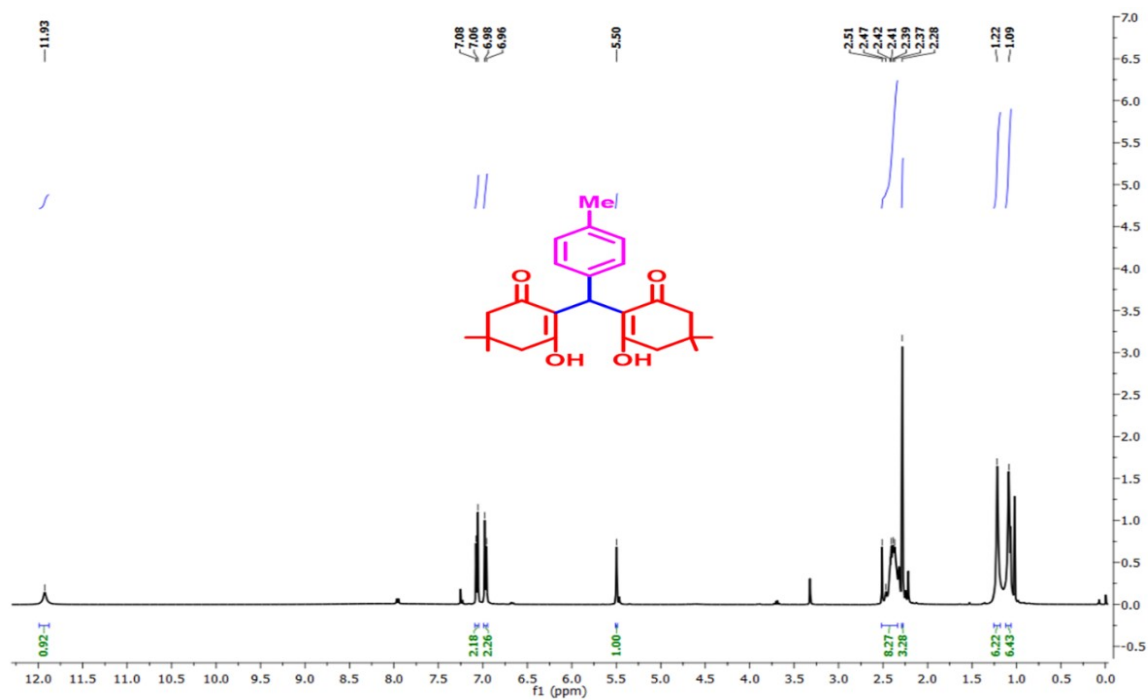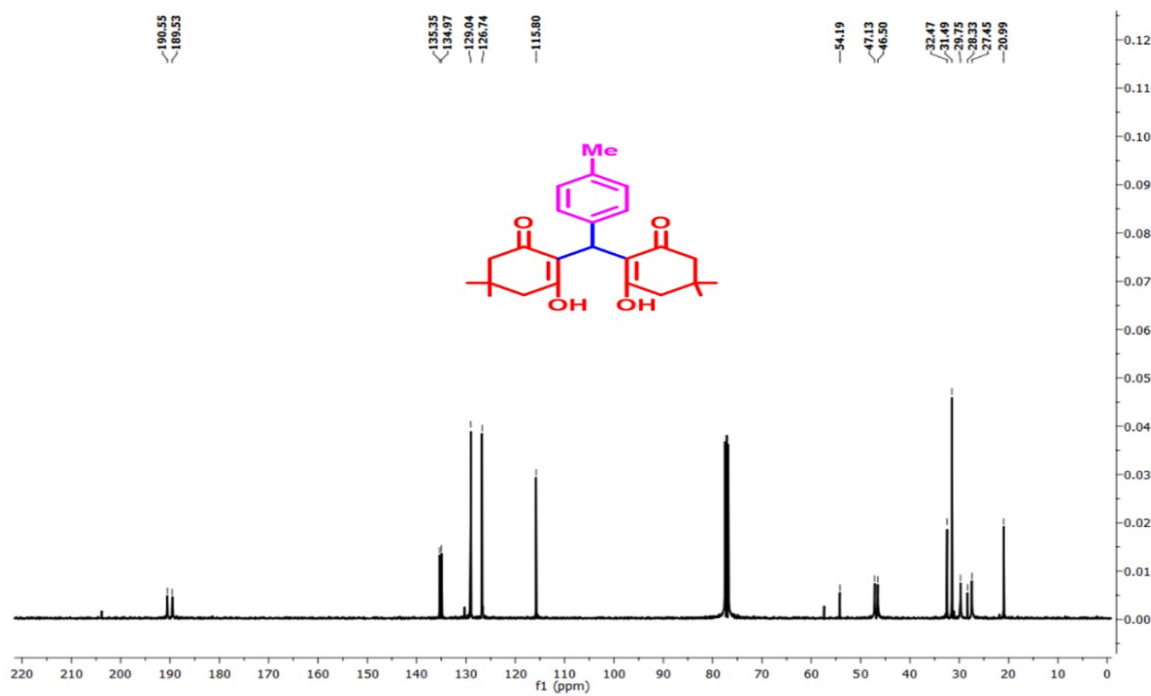

3.  $^1\text{H}$  and  $^{13}\text{C}$  spectra of 2,2'-((4-nitrophenyl)methylene)bis(3-hydroxy-5,5-dimethylcyclohex-2-en-1-one)

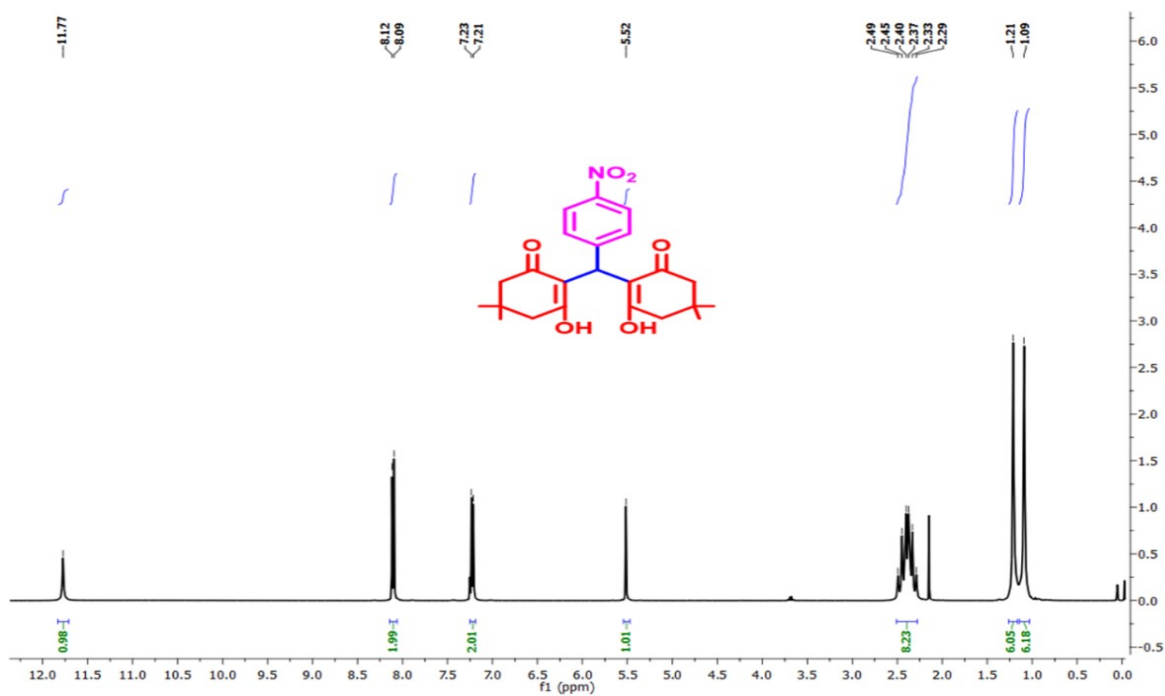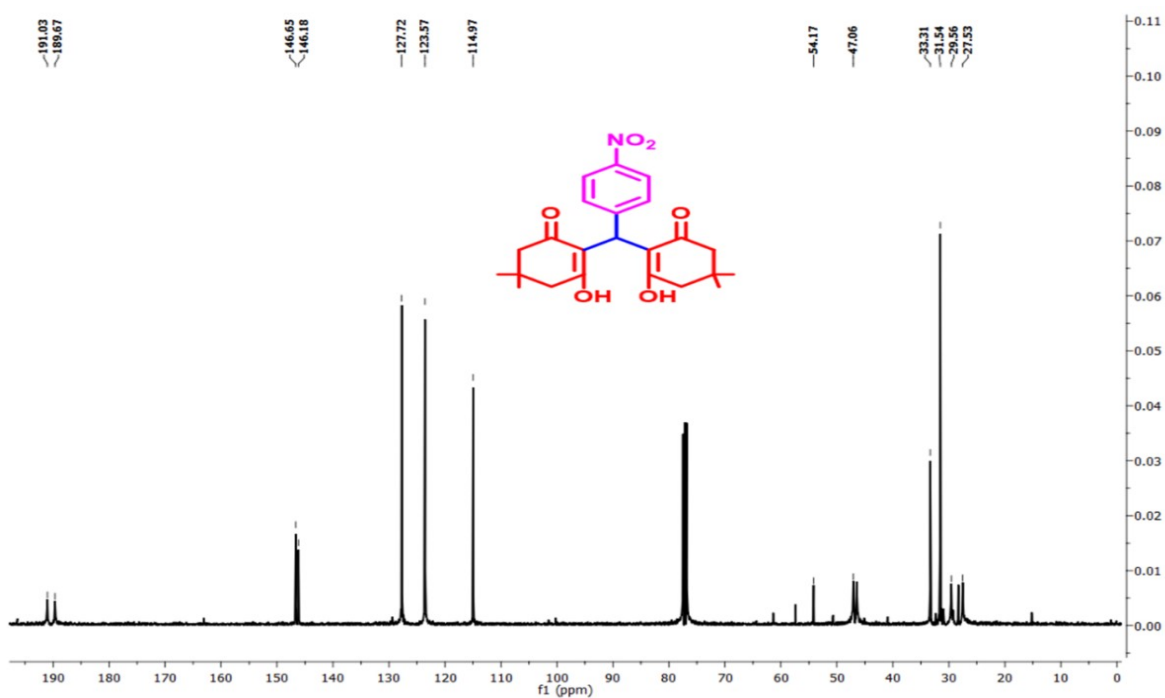

4.  $^1\text{H}$  and  $^{13}\text{C}$  spectra of 2,2'-((4-methoxyphenyl)methylene)bis(3-hydroxy-5,5-dimethylcyclohex-2-en-1-one)

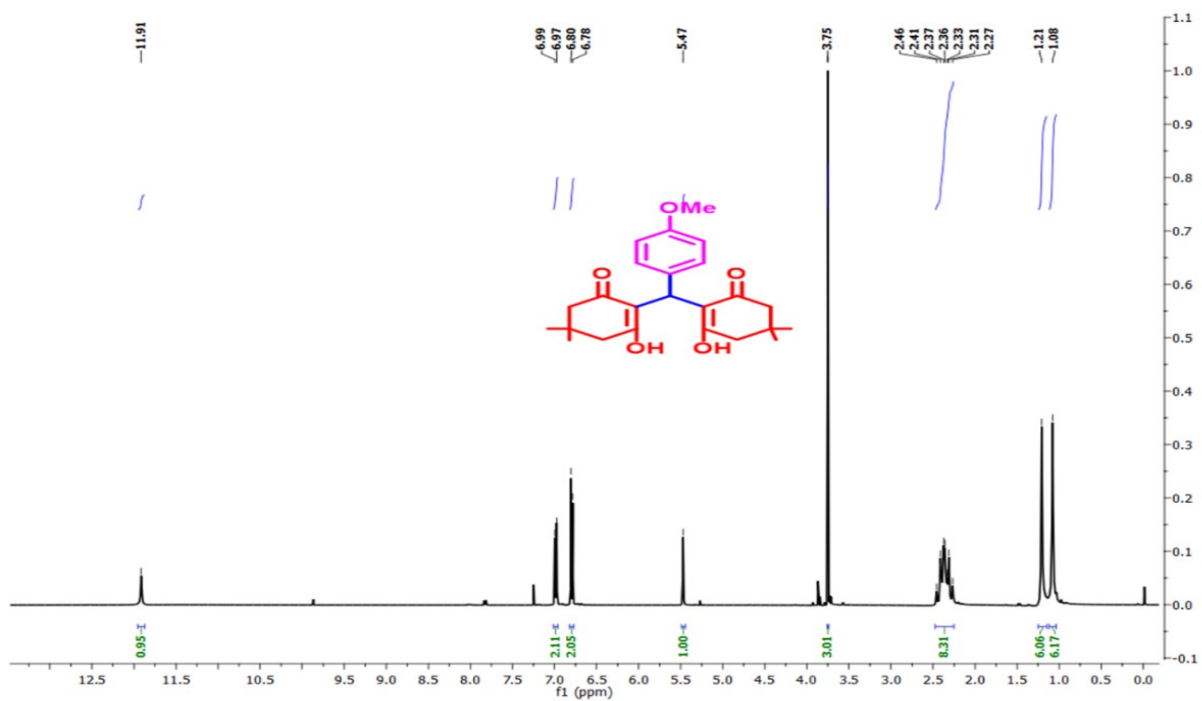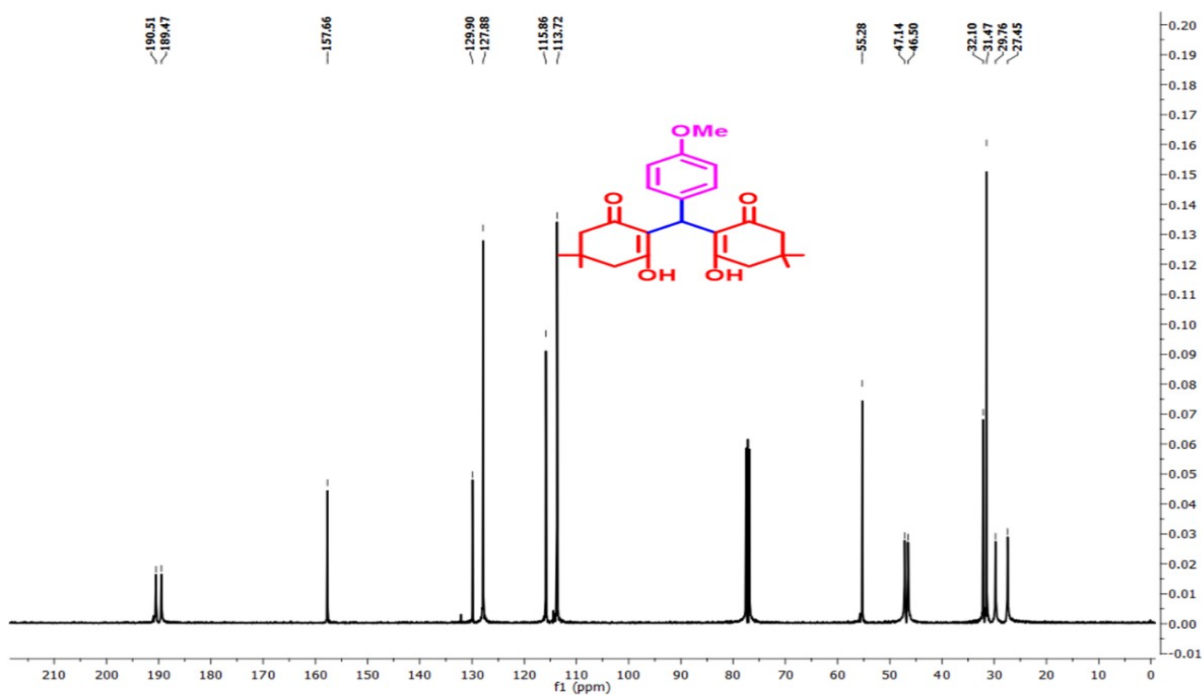

5.  $^1\text{H}$  and  $^{13}\text{C}$  spectra of 2,2'-((2-nitrophenyl)methylene)bis(3-hydroxy-5,5-dimethylcyclohex-2-en-1-one)

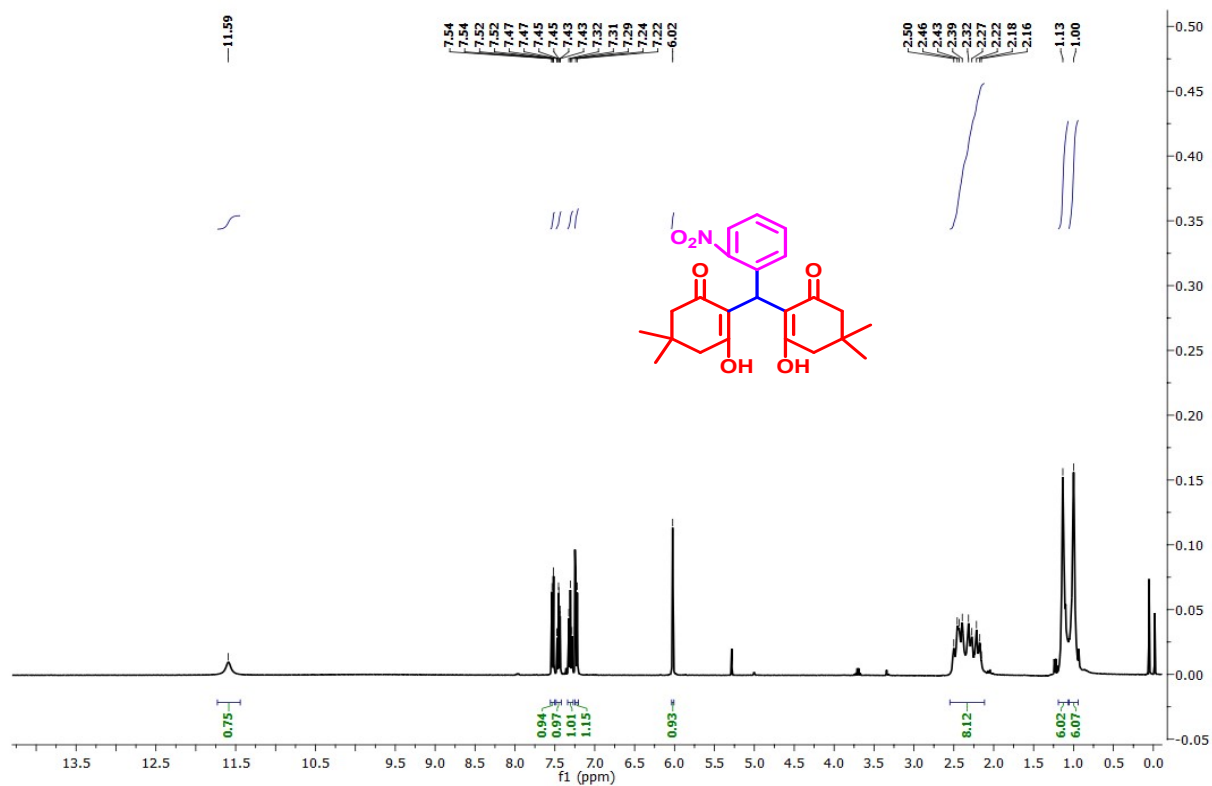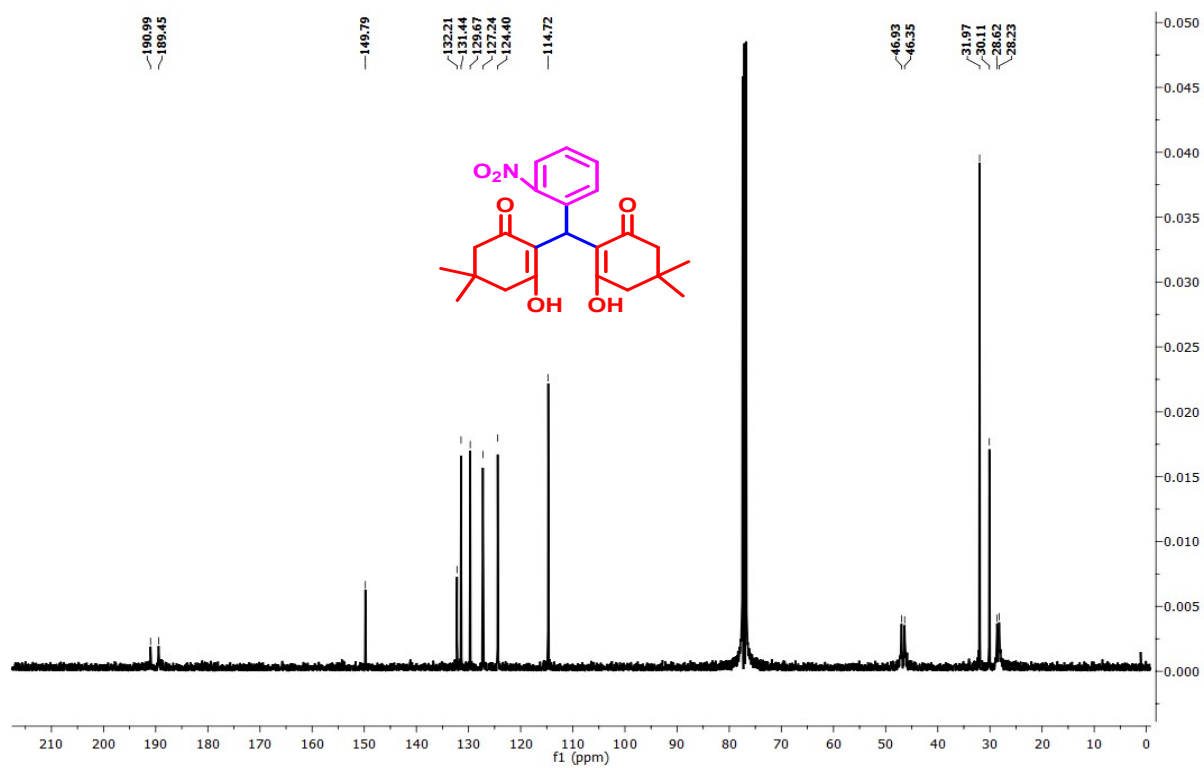



6.  $^1\text{H}$  and  $^{13}\text{C}$  spectra of 2,2'-((3-nitrophenyl)methylene)bis(3-hydroxy-5,5-dimethylcyclohex-2-en-1-one)

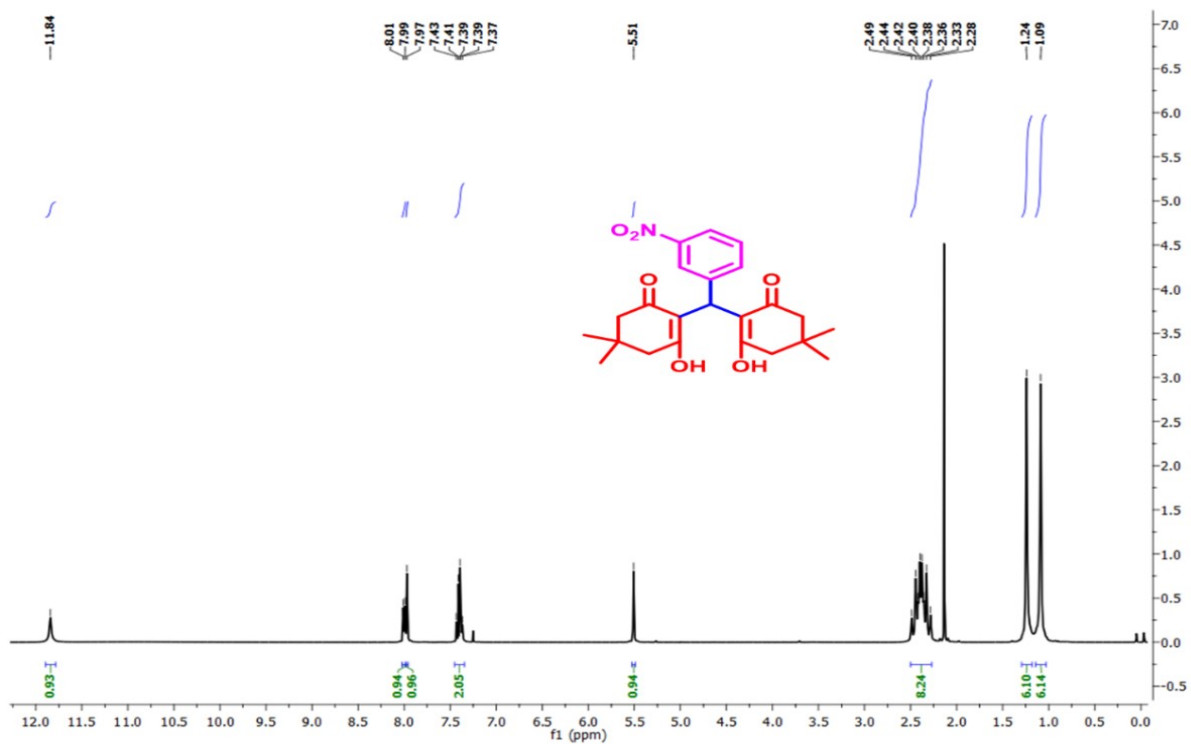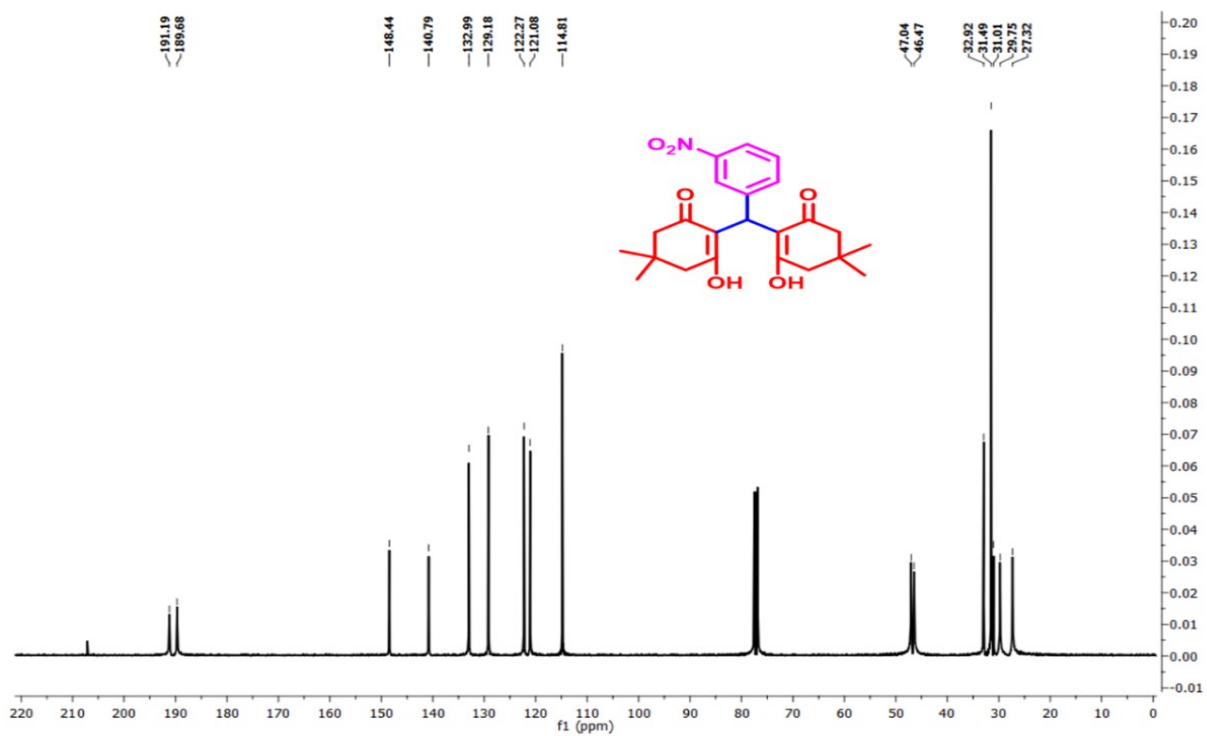

7.  $^1\text{H}$  and  $^{13}\text{C}$  spectra of 2,2'-((3,4-dibromophenyl)methylene)bis(3-hydroxy-5,5-dimethylcyclohex-2-en-1-one)

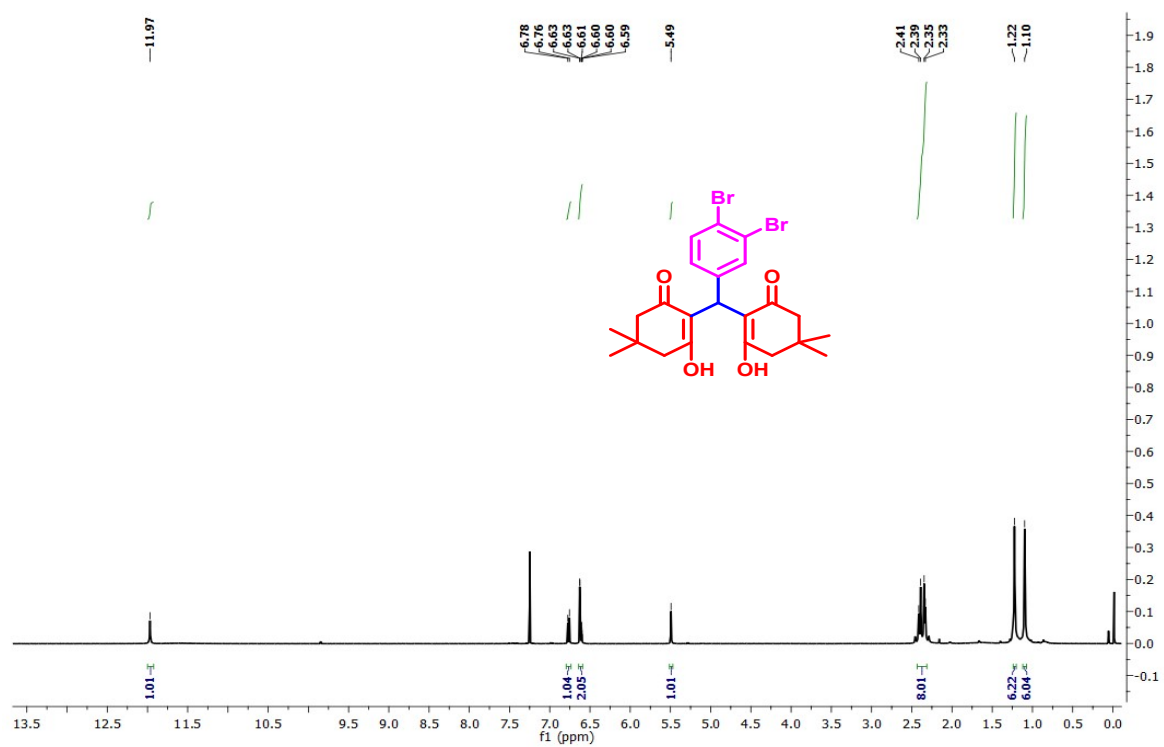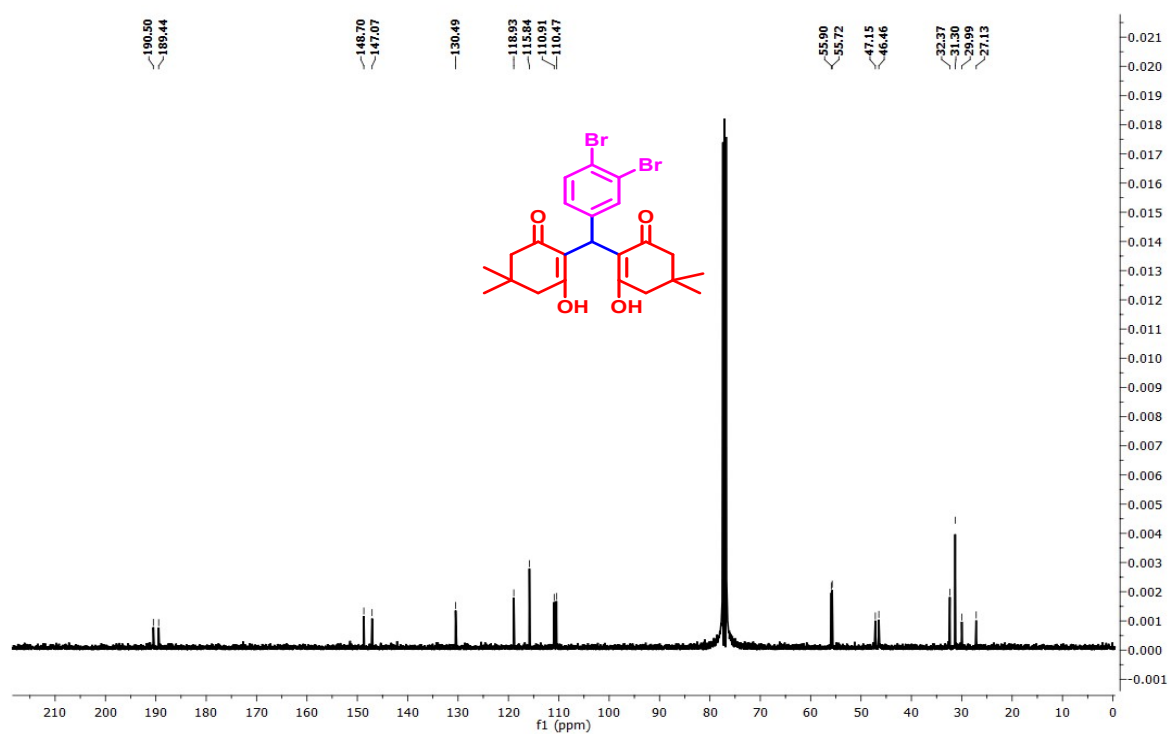

## S2: Single Crystal X-ray Diffraction Analysis of 2,2'-(phenylmethylene)bis(3-hydroxy-5,5-dimethylcyclohex-2-en-1-one)

Compound (2,2'-(phenylmethylene)bis(3-hydroxy-5,5-dimethylcyclohex-2-en-1-one)) was dissolved in methyl alcohol and single crystals (appropriate for X-ray diffraction studies) were grown by allowing slow evaporation of the solvent at room temperature. The X-ray diffraction data was collected on X'calibur CCD diffractometer employing a graphite monochromatized Mo/K $\alpha$  radiation ( $\lambda = 0.71073 \text{ \AA}$ ) at a temperature of 293 K. The crystal data was analyzed using CrysAlis pro software available with the diffractometer. Further, least square refinement, following introduction of anisotropic displacement parameters, yielded the R values mentioned in the **Table S1**. The structure was solved by direct methods using SHELXT-2018 and refined by the full-matrix least-squares method on  $F^2$  (SHELXL-2018/3). All calculations were carried out using the OLEX2 package of the crystallographic programs and the program Mercury (4.2.0) was used for molecular graphics. The selected bond lengths, bond angles, *etc.* are given in **Table S1**.

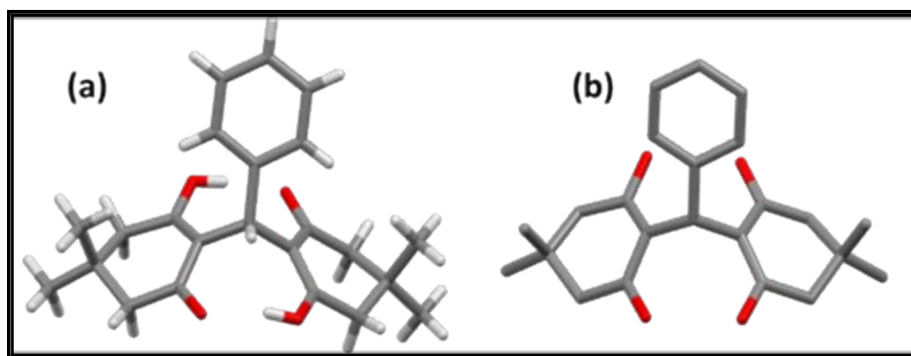

**Figure S1:** Molecular structures (a & b) of 2,2'-(phenylmethylene)bis(3-hydroxy-5,5-dimethylcyclohex-2-en-1-one) H atoms are omitted in **b** for clarity. C = gray, O = red.

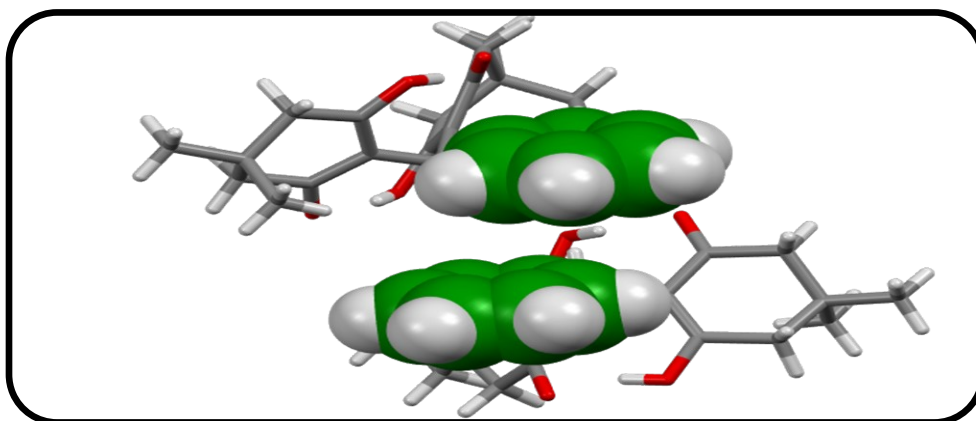

**Figure S2:** Double decker  $\pi$ -stacked arrangement of two phenolic ring between the adjacent molecules.

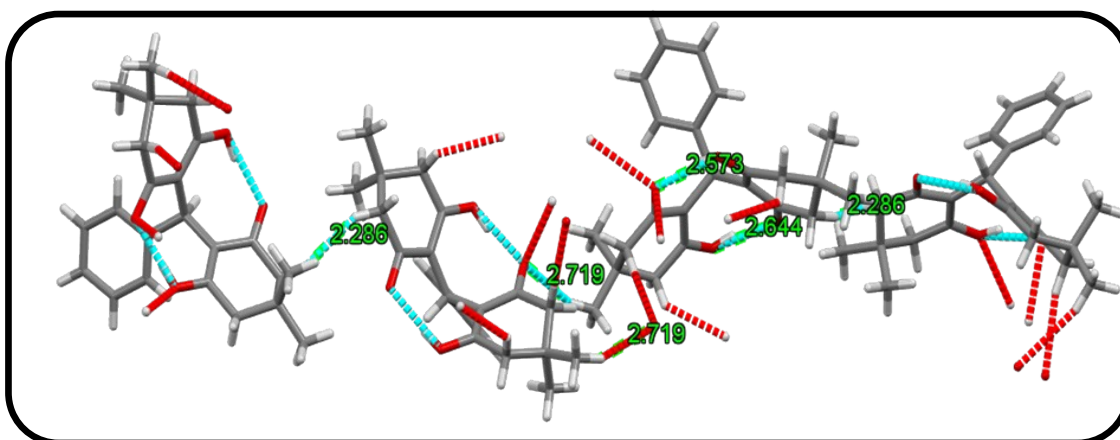

**Figure S3:** 1D arrangement of 2,2'-(phenylmethylene)bis(3-hydroxy-5,5-dimethylcyclohex-2-en-1-one) *via* intra- and intermolecular non-covalent interactions within the molecule and between the adjacent molecules.

**Table S1:** Crystal data and structure refinement for compound

| Identification Name              | <b>2,2'-(phenylmethylene)bis<br/>(3-hydroxy-5,5-dimethylcyclohex-2-en-1-one)</b> |
|----------------------------------|----------------------------------------------------------------------------------|
| Empirical formula                | C <sub>23</sub> H <sub>28</sub> O <sub>4</sub>                                   |
| Formula weight                   | 368.45                                                                           |
| Temperature/K                    | 100                                                                              |
| Crystal system                   | Monoclinic                                                                       |
| Space group                      | P 21/n                                                                           |
| a/Å                              | 20.9275(4)                                                                       |
| b/Å                              | 20.9275(4)                                                                       |
| c/Å                              | 36.9289(11)                                                                      |
| $\alpha/^\circ$                  | 90                                                                               |
| $\beta/^\circ$                   | 90                                                                               |
| $\gamma/^\circ$                  | 90                                                                               |
| Volume/Å <sup>3</sup>            | 16173.4(8)                                                                       |
| Z                                | 450                                                                              |
| $\rho_{\text{calc}}/\text{cm}^3$ | 1.211                                                                            |
| $\mu/\text{mm}^{-1}$             | 0.106                                                                            |
| F(000)                           | 6336                                                                             |

|                                                  |                                                                                  |
|--------------------------------------------------|----------------------------------------------------------------------------------|
| Identification Name                              | <b>2,2'-(phenylmethylene)bis<br/>(3-hydroxy-5,5-dimethylcyclohex-2-en-1-one)</b> |
| Radiation                                        | Mo/K $_{\alpha}$ ( $\lambda = 0.71073$ )                                         |
| 2 $\Theta$ range for data collection/ $^{\circ}$ | 3.2550 to 28.3542                                                                |
| Index ranges                                     | $-10 \leq h \leq 10$ , $-10 \leq k \leq 10$ , $-20 \leq l \leq 20$               |
| No of Reflections measured                       | 10572                                                                            |
| Independent reflections                          | 6374                                                                             |
| Goodness-of-fit on F $^2$                        | 1.06                                                                             |
| R [F $^2 > 2\sigma$ (F $^2$ )], $wR$ (all data)  | 0.0781, 0.1813                                                                   |
